# Supplementary material for: Characteristics of PM2.5 Pollution in Osorno, Chile: Ion Chromatography and Meteorological Data Analyses
Source: MDPI journal article supplement (doi:10.3390/atmos13020168), 2022-01-20
Supplement: s1 [file s1]

Archive with 2 entries (2 files):
- atmosphere-1556277-supplementary.pdf
- atmosphere-1556277-Video S1. a video image of the emergency day of the winter period of Osorno city, an example from 18 July 2021.MOV
