# Supplementary material for: Characteristics of PM2.5 Pollution in Osorno, Chile: Ion Chromatography and Meteorological Data Analyses
Source: MDPI journal article supplement (doi:10.3390/atmos13020168), 2022-01-20
Supplement: s1 [file s1 › atmosphere-1556277-supplementary.pdf]

# Characteristics of PM<sub>2.5</sub> Pollution in Osorno, Chile: Ion Chromatography and Meteorological Data Analyses

Ayane Nakamura<sup>1</sup>, Nobutake Nakatani<sup>2</sup>, Fumito Maruyama<sup>3</sup>, So Fujiyoshi<sup>3</sup>, Rodrigo Márquez-Reyes<sup>4</sup>, Ricardo Fernández<sup>5</sup> and Jun Noda<sup>1,\*</sup>

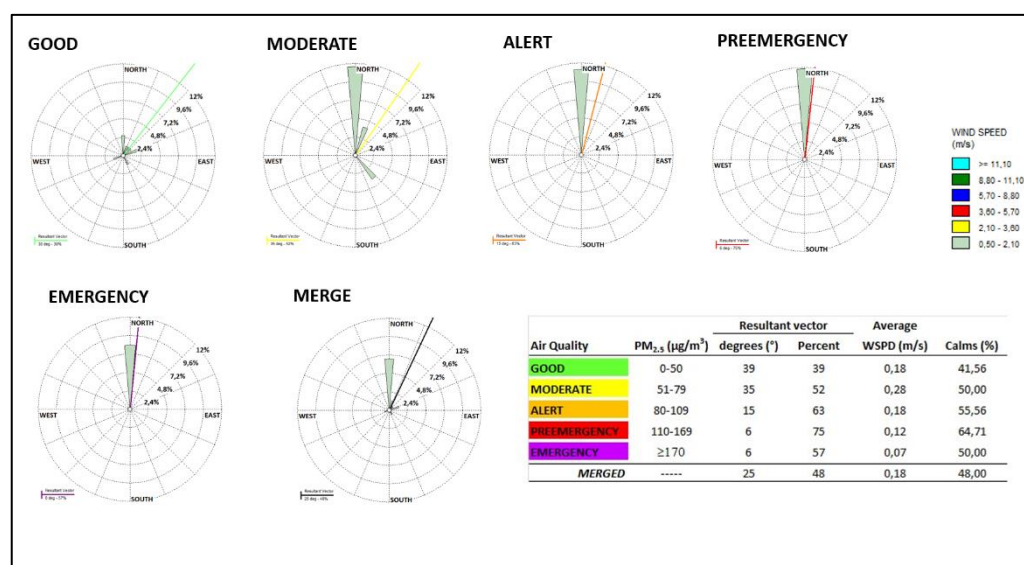

Figure S1. Wind rose separated by AQI.

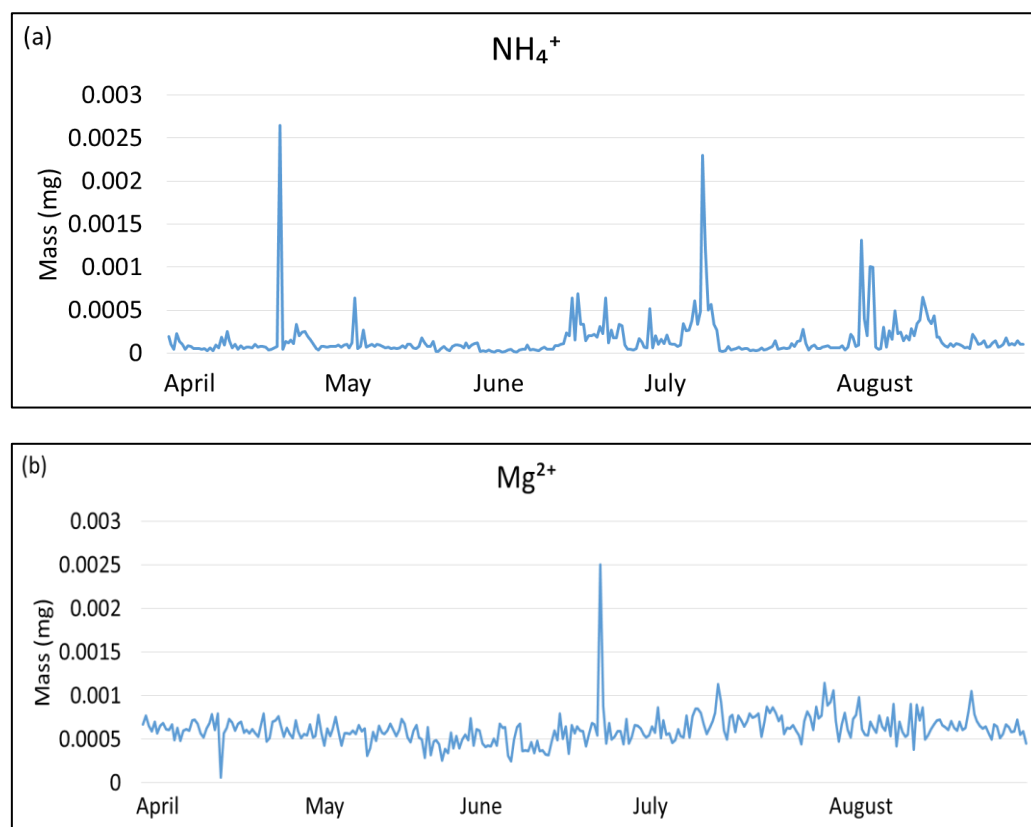

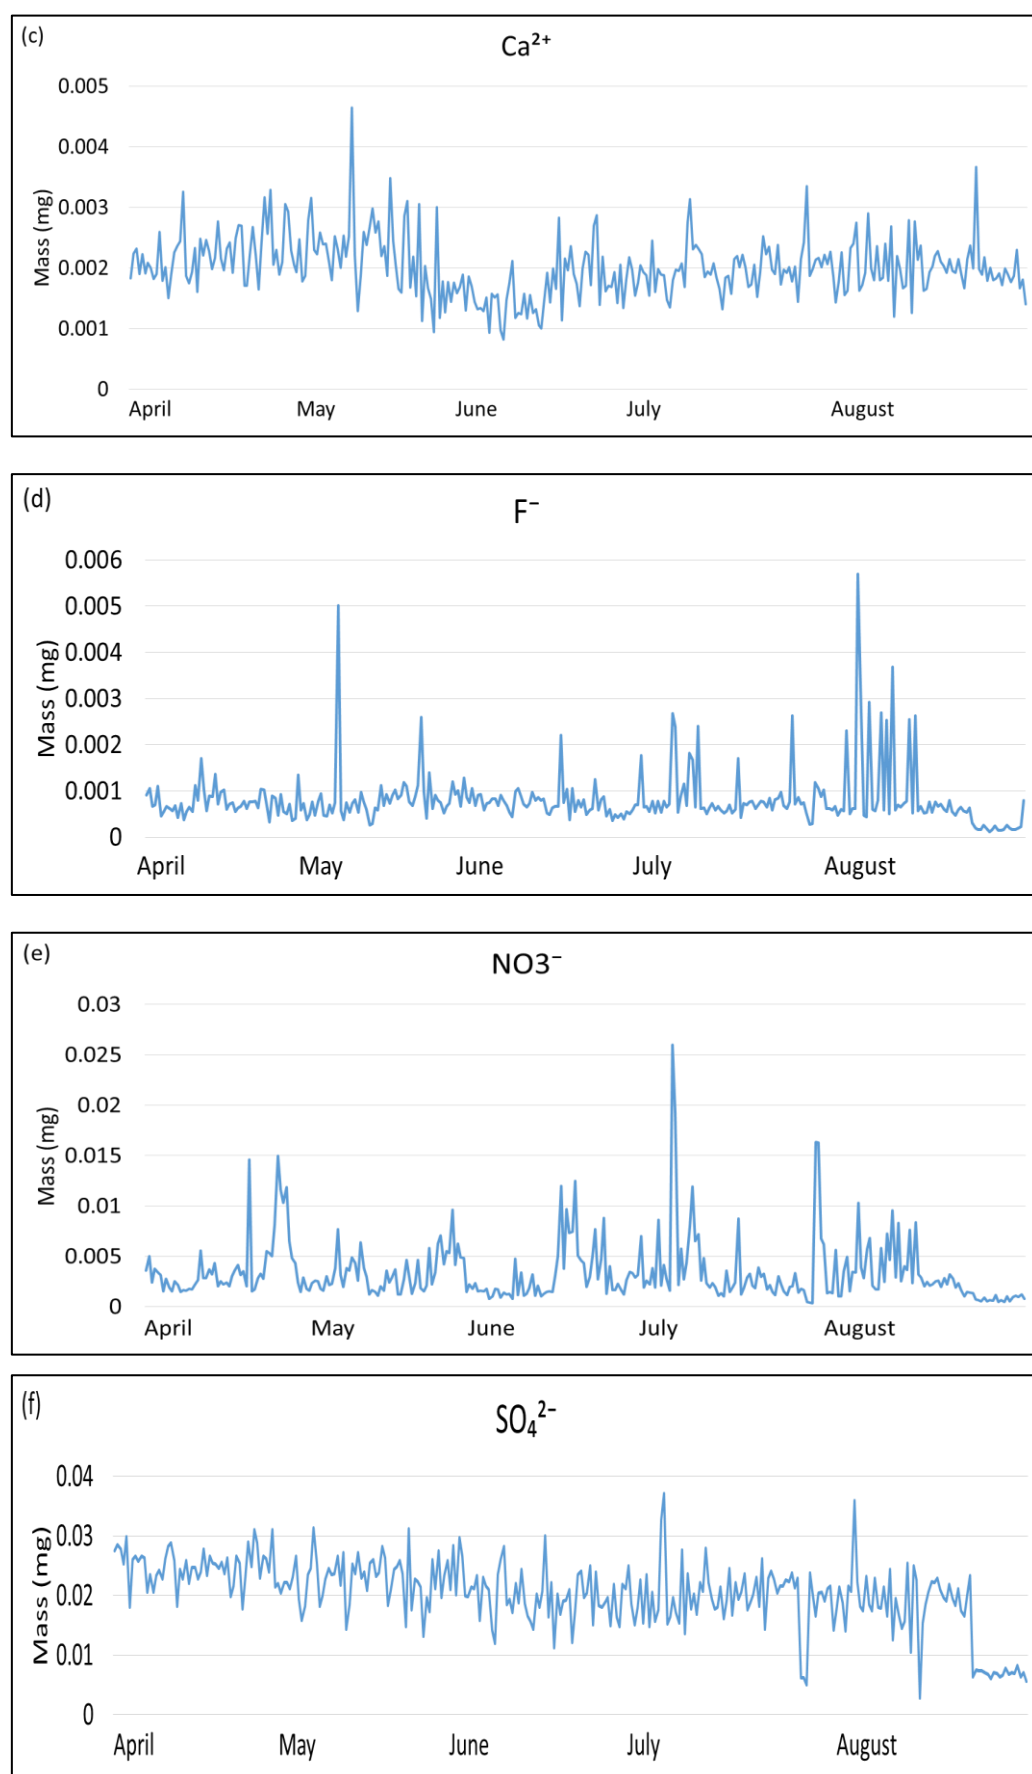

**Figure S2.** (a)  $\text{NH}_4^+$  monthly variation, (b)  $\text{Mg}^{2+}$  monthly variation, (c)  $\text{Ca}^{2+}$  monthly variation, (d)  $\text{F}^-$  monthly variation, (e)  $\text{NO}_3^-$  monthly variation, (f)  $\text{SO}_4^{2-}$  monthly variation

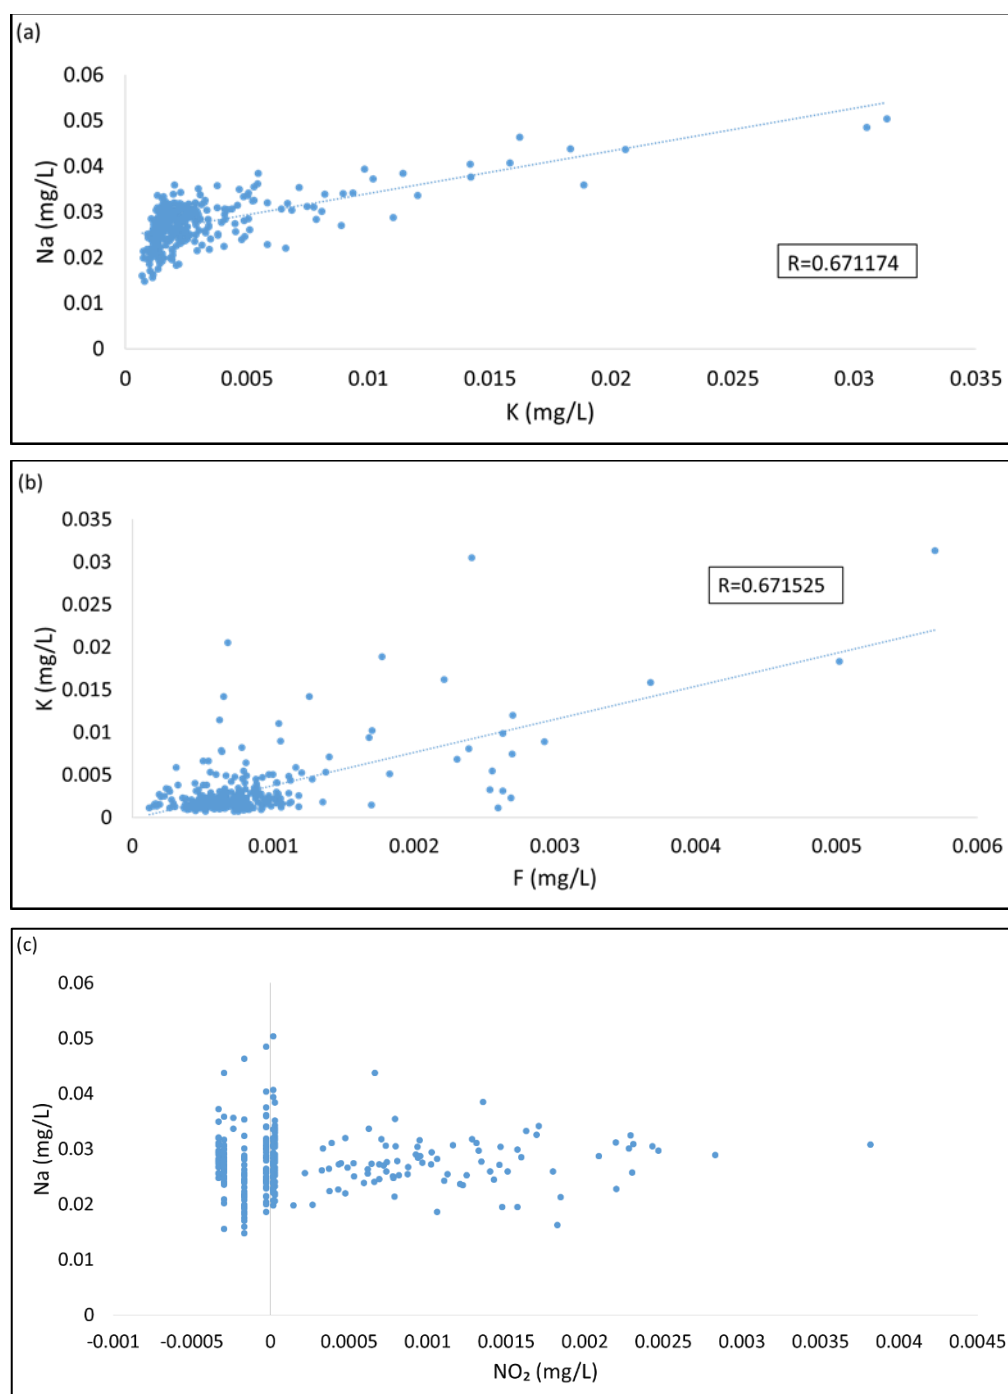

**Figure S3.** Relationship between two detected ions. (a)  $\text{Na}^+$  and  $\text{K}^+$ , (b)  $\text{K}^+$  and  $\text{F}^-$ , (c)  $\text{Na}^+$  and  $\text{NO}_2$
